# Supplementary material
Source: publisher site journal article supplement (https://www.dovepress.com/article/245056)
Supplement: Supplementary file 1 [file get_supplementary_file.php]

| **Supplementary Table A1. The association of increased** **eosinophils measured at index hospitalization with the risk of** **all-cause death among patients hospitalized for AECOPD according to Cox regression analysis (****using blood eosinophils ≥200** **cells/μl as the cutoff value) (N=829)** | | | | |
| --- | --- | --- | --- | --- |
| Variables | Unadjusted HR  (95% CI) | *P*-value | Multi-adjusted HR  (95% CI) | *P*-value |
| Age ≥ 60 years | 2.15 (1.33-3.46) | 0.002 | 2.15 (1.34-3.47) | 0.002 |
| Eosinophils ≥200 cells/μl | 0.74 (0.56-0.97) | 0.031 | 0.76 (0.58-1.01) | 0.055 |
| Charlson Comorbidity Index | 1.19 (1.06-1.33) | 0.003 | 1.14 (1.02-1.28) | 0.023 |
| Hospitalization for COPD in the previous year | 1.39 (1.11-1.74) | 0.004 | 1.38 (1.10-1.73) | 0.005 |
| **Abbreviations**: AECOPD, acute exacerbation of chronic obstructive pulmonary disease; COPD, chronic obstructive pulmonary disease. | | | | |

| **Supplementary Table A2. The association of increased eosinophils measured** **at index hospitalization with the risk of all-cause death among patients hospitalized for AECOPD according to Cox regression analysis (using blood eosinophils ≥300** **cells/μl as the cutoff value) (N=829)** | | | | |
| --- | --- | --- | --- | --- |
| Variables | Unadjusted HR  (95% CI) | *P*-value | Multi-adjusted HR  (95% CI) | *P*-value |
| Age ≥ 60 years | 2.15 (1.33-3.46) | 0.002 | 2.12 (1.31-3.41) | 0.002 |
| Eosinophils ≥300 cells/μl | 0.72 (0.51-1.02) | 0.068 | 0.78 (0.55-1.10) | 0.153 |
| Charlson Comorbidity Index | 1.19 (1.06-1.33) | 0.003 | 1.14 (1.02-1.28) | 0.020 |
| Hospitalization for COPD in the previous year | 1.39 (1.11-1.74) | 0.004 | 1.38 (1.10-1.73) | 0.005 |
| **Abbreviations**: AECOPD, acute exacerbation of chronic obstructive pulmonary disease; COPD, chronic obstructive pulmonary disease. | | | | |

| **Supplementary Table A3. The association of increased eosinophils measured at index hospitalization with the risk of all-cause death among patients hospitalized for AECOPD according to Cox regression analysis（****N=1029）** | | | | |
| --- | --- | --- | --- | --- |
| Variables | Unadjusted HR  (95% CI) | *P*-value | Multi-adjusted HR  (95% CI) | *P*-value |
| Age ≥60 years | 2.28 (1.42-3.67) | 0.001 | 2.23 (1.38-3.59) | 0.001 |
| Eosinophils ≥150 cells/μl | 0.75 (0.58-0.96) | 0.023 | 0.75 (0.59-0.97) | 0.025 |
| Charlson Comorbidity Index | 1.21 (1.08-1.35) | 0.001 | 1.17 (1.05-1.31) | 0.006 |
| Hospitalization for COPD in the previous year | 1.16 (0.93-1.45) | 0.189 | 1.16 (0.93-1.45) | 0.201 |
| **Abbreviations:** AECOPD, acute exacerbation of chronic obstructive pulmonary disease; COPD, chronic obstructive pulmonary disease. | | | | |

| **Supplementary Table A4. The association of** **predominant** **eosinophilia with the risk of all-cause death** **among** **patients readmitted for AECOPD according to Cox regression analysis (using blood eosinophils ≥200** **cells/****μl as the cutoff value) (N=241)** | | | | |
| --- | --- | --- | --- | --- |
| Variables | Unadjusted HR  (95% CI) | *P*-value | Multi-adjusted HR  (95% CI) | *P*-value |
| Age ≥60 years | 2.70 (0.99-7.34) | 0.052 | 2.73 (1.00-7.45) | 0.050 |
| Eosinophils ≥200 cells/μl  Rare eosinophilia  Intermittent eosinophilia  Predominant eosinophilia  ***P* trend** | Reference  0.76 (0.48-1.21)  0.72 (0.34-1.50) | 0.248  0.374  0.404 | Reference  0.78 (0.49-1.23)  0.80 (0.38-1.69) | 0.276  0.560  0.513 |
| Charlson Comorbidity Index | 1.17 (0.99-1.39) | 0.072 | 1.14 (0.96-1.37) | 0.137 |
| Hospitalization for COPD in the previous year | 1.60 (1.05-2.43) | 0.028 | 1.52 (1.00-2.31) | 0.052 |
| **Abbreviations**: AECOPD, acute exacerbation of chronic obstructive pulmonary disease; COPD, chronic obstructive pulmonary disease. | | | | |

| **Supplementary Table A5. The association of** **predominant eosinophilia with the risk of all-cause death among patients readmitted for AECOPD according to Cox regression analysis** **(using blood eosinophils ≥300** **cells/μl as the cutoff value) (N=241)** | | | | |
| --- | --- | --- | --- | --- |
| Variables | Unadjusted HR  (95% CI) | *P*-value | Multi-adjusted HR  (95% CI) | *P*-value |
| Age ≥60 years | 2.70 (0.99-7.34) | 0.052 | 2.74 (1.00-7.47) | 0.049 |
| Eosinophils ≥300 cells/μl  Rare eosinophilia  Intermittent eosinophilia  Predominant eosinophilia  ***P* trend** | Reference  0.63 (0.34-1.16)  0.64 (0.20-2.03) | 0.137  0.452  0.267 | Reference  0.68 (0.37-1.26)  0.63 (0.20-2.01) | 0.218  0.437  0.369 |
| Charlson Comorbidity Index | 1.17 (0.99-1.39) | 0.072 | 1.13 (0.95-1.35) | 0.171 |
| Hospitalization for COPD in the previous year | 1.60 (1.05-2.43) | 0.028 | 1.51 (0.99-2.31) | 0.057 |
| **Abbreviations**: AECOPD, acute exacerbation of chronic obstructive pulmonary disease; COPD, chronic obstructive pulmonary disease. | | | | |

| **Supplementary Table A6. The association of predominant eosinophilia with the risk of all-cause death among patients readmitted for AECOPD according to Cox regression analysis** **(using blood eosinophils ≥150 cells/μl as the cutoff value)（N=250）** | | | | |
| --- | --- | --- | --- | --- |
| Variables | Unadjusted HR  (95% CI) | *P*-value | Multi-adjusted HR  (95% CI) | *P*-value |
| Age ≥60 years | 2.70 (0.99-7.35) | 0.052 | 2.92 (1.07-7.98) | 0.036 |
| Eosinophils≥150 cell/μl  Rare eosinophilia  Intermittent eosinophilia  Predominant eosinophilia  ***P* trend** | Reference  0.73 (0.48-1.12)  0.44 (0.22-0.86) | 0.147  0.017  0.040 | Reference  0.72 (0.47-1.11)  0.43 (0.22-0.85) | 0.133  0.016  0.037 |
| Charlson Comorbidity Index | 1.16 (0.98-1.38) | 0.093 | 1.13 (0.95-1.35) | 0.174 |
| Hospitalization for COPD in the previous year | 1.57 (1.04-2.39) | 0.034 | 1.53 (1.01-2.33) | 0.047 |
| **Abbreviations:** AECOPD, acute exacerbation of chronic obstructive pulmonary disease; COPD, chronic obstructive pulmonary disease. | | | | |

| **Supplementary Table A7.** **The association of increased eosinophils measured at baseline with** **the risk of all-cause death among** **patients readmitted for AECOPD according to Cox regression analysis (using blood eosinophils ≥150 cells/μl as the cutoff value) (N=241)** | | | | |
| --- | --- | --- | --- | --- |
| Variables | Unadjusted HR  (95% CI) | *P*-value | Multi-adjusted HR  (95% CI) | *P*-value |
| Age ≥60 years | 2.70 (0.99-7.34) | 0.052 | 2.74 (1.00-7.49) | 0.049 |
| Eosinophils ≥150 cells/ul | 0.88 (0.57-1.34) | 0.547 | 0.86 (0.56-1.33) | 0.502 |
| Charlson Comorbidity Index | 1.17 (0.99-1.39) | 0.072 | 1.15 (0.96-1.37) | 0.130 |
| Hospitalization for COPD in the previous year | 1.60 (1.05-2.43) | 0.028 | 1.54 (1.01-2.35) | 0.045 |
| **Abbreviations**: AECOPD, acute exacerbation of chronic obstructive pulmonary disease; COPD, chronic obstructive pulmonary disease. | | | | |

| **Supplementary Table A8.****The association of increased eosinophils measured at index hospitalization with the risk of all-cause death among patients** **hospitalized for AECOPD after** **excluding the patients with a history of asthma according to Cox regression analysis (N=760)** | | | | |
| --- | --- | --- | --- | --- |
| Variables | Unadjusted HR  (95% CI) | *P*-value | Multi-adjusted HR  (95% CI) | *P*-value |
| Age ≥60 years | 1.89 (1.16-3.08) | 0.011 | 1.90 (1.16-3.10) | 0.011 |
| Eosinophils ≥150 cells/μl | 0.75 (0.58-0.98) | 0.033 | 0.76 (0.59-0.99) | 0.043 |
| Charlson Comorbidity Index | 1.16 (1.04-1.31) | 0.011 | 1.13 (1.00-1.27) | 0.053 |
| Hospitalization for COPD in the previous year | 1.39 (1.10-1.76) | 0.006 | 1.39 (1.10-1.76) | 0.006 |
| **Abbreviations:** AECOPD, acute exacerbation of chronic obstructive pulmonary disease; COPD, chronic obstructive pulmonary disease. | | | | |

| **Supplementary table A9. The association of interquartile levels of blood eosinophil counts at index hospitalization with the risk of all-cause death among patients hospitalized for AECOPD according to Cox regression analysis （N=829）** | | | | |
| --- | --- | --- | --- | --- |
| Variables | Unadjusted HR  (95% CI) | *P*-value | Multi-adjusted HR  (95% CI) | *P*-value |
| Age ≥ 60 years | 2.15 (1.33-3.46) | 0.002 | 2.15 (1.33-3.46) | 0.002 |
| blood eosinophil counts |  |  |  |  |
| 1st interquartile level (0-10) | Reference |  | Reference |  |
| 2nd interquartile level (11-80) | 1.06 (0.79-1.43) | 0.685 | 1.04 (0.78-1.40) | 0.781 |
| 3rd interquartile level (81-190) | 0.87 (0.64-1.19) | 0.379 | 0.86 (0.63-1.17) | 0.341 |
| 4th interquartile level (191-1320) | 0.72 (0.53-0.99) | 0.044 | 0.74 (0.54-1.01) | 0.060 |
| ***P* trend** |  | 0.027 |  | 0.038 |
| Charlson Comorbidity Index | 1.19 (1.06-1.33) | 0.003 | 1.14 (1.02-1.28) | 0.026 |
| Hospitalization for COPD in the previous year | 1.39 (1.11-1.74) | 0.004 | 1.39 (1.11-1.74) | 0.004 |
|  | | | | |

| **Supplementary Table A10. The association of predominant eosinophilia with the risk of all-cause death among** **patients readmitted for AECOPD** **after excluding the patients with a history of asthma according to Cox regression analysis（N=218）** | | | | |
| --- | --- | --- | --- | --- |
| Variables | Unadjusted HR  (95% CI) | *P*-value | Multi-adjusted HR  (95% CI) | *P*-value |
| Age ≥60 years | 2.51 (0.79-7.94) | 0.118 | 2.92 (0.92-9.32) | 0.070 |
| Eosinophils≥150 cell//μl  Rare eosinophilia  Intermittent eosinophilia  Predominant eosinophilia  **P trend** | Reference  0.77 (0.50-1.20)  0.33 (0.15-0.74) | 0.249  0.007  0.022 | Reference  0.74 (0.47-1.15)  0.32 (0.15-0.72) | 0.179  0.006  0.017 |
| Charlson Comorbidity Index | 1.14 (0.96-1.37) | 0.140 | 1.12 (0.93-1.34) | 0.235 |
| Hospitalization for COPD in the previous year | 1.54 (0.99-2.38) | 0.056 | 1.45 (0.93-2.26) | 0.097 |
| **Abbreviations:** AECOPD, acute exacerbation of chronic obstructive pulmonary disease; COPD, chronic obstructive pulmonary disease. | | | | |

| **Supplementary Table A11. The association of increased eosinophils measured at index hospitalization with the risk of all-cause death among patients hospitalized for AECOPD according to Cox regression analysis (using blood eosinophils ≥150 cells/μl as the cutoff value) (N=829)** | | | | |
| --- | --- | --- | --- | --- |
| Variables | Unadjusted HR  (95% CI) | *P*-value | Multi-adjusted HR  (95% CI) | *P*-value |
| Age ≥60 years | 2.15 (1.33-3.46) | 0.002 | 2.18 (1.36-3.52) | 0.001 |
| Eosinophils ≥150 cells/μl | 0.75 (0.58-0.96) | 0.025 | 0.76 (0.59-0.98) | 0.032 |
| Charlson Comorbidity Index | 1.19 (1.06-1.33) | 0.003 | 1.14 (1.02-1.28) | 0.025 |
| Hospitalization for COPD in the previous year | 1.39 (1.11-1.74) | 0.004 | 1.41 (1.13-1.77) | 0.003 |
| ICS during admission | 0.76 (0.59-0.97) | 0.029 | 0.73 (0.57-0.93) | 0.012 |
| **Abbreviations:** AECOPD, acute exacerbation of chronic obstructive pulmonary disease; COPD, chronic obstructive pulmonary disease; ICS, inhaled corticosteroid | | | | |

| **Supplementary Table A12. The association of predominant eosinophilia with the risk of all-cause death among patients readmitted for AECOPD according to Cox regression analysis (using blood eosinophils ≥150 cells/μl as the cutoff value) (N=241)** | | | | |
| --- | --- | --- | --- | --- |
| Variables | Unadjusted HR  (95% CI) | *P*-value | Multi-adjusted HR  (95% CI) | *P*-value |
| Age ≥60 years | 2.70 (0.99-7.34) | 0.052 | 2.83 (1.04-7.76) | 0.043 |
| Eosinophils≥150 cells/μl  Rare eosinophilia  Intermittent eosinophilia  Predominant eosinophilia  P trend | Reference  0.73 (0.48-1.12)  0.44 (0.22-0.86) | 0.147  0.017  0.040 | Reference  0.72 (0.47-1.11)  0.43 (0.22-0.85) | 0.136  0.015  0.036 |
| Charlson Comorbidity Index | 1.17 (0.99-1.39) | 0.072 | 1.13 (0.95-1.34) | 0.176 |
| Hospitalization for COPD in the previous year | 1.60 (1.05-2.43) | 0.028 | 1.52 (1.00-2.32) | 0.052 |
| ICS during admission | 0.78 (0.49-1.25) | 0.300 | 0.82 (0.51-1.31) | 0.399 |
| **Abbreviations:** AECOPD, acute exacerbation of chronic obstructive pulmonary disease; COPD, chronic obstructive pulmonary disease; ICS, Inhaled corticosteroids. | | | | |
